# Supplementary material
Source: publisher figshare collection journal article supplement (https://karger.figshare.com/ndownloader/files/14488301)
Supplement: Supplementary file 1 [file 14488301]

## Sheet: Лист1
Suppl. Table 5. Divergence between the reference genome of Anolis carolinensis (AnoCar2.0) and the samples sequenced in our study (substitutions per kbp).
	NSA6	NSA8-9	NSA10-11	NSA12	NSA13-14	NSAX	NSAY
total	21.26	16.5	16.32	12.04	12.91	18.83	24.48
exon	16.74	11.32	18.82	12.29	17.87	18.64	22.25
intron	22.43	17.68	14.57	12.48	13.59	20.09	27.04
intergen	20.97	16.55	16.89	11.59	10.64	17.7	23.11
	ACA6	ACA7-8	ACA9	ACA10-11	ACA12-13	ACA14	ACA15-17	ACA18
total	2.66	3.03	2.5	2.22	1.54	1.93	2.67	1.03
exon	1.6	1.61	1.88	1.68	0.81	3.64	2.01	0
intron	2.54	3.01	2.45	2.25	1.58	2.19	2.58	0.65
intergen	2.86	3.12	2.62	2.24	1.63	1.48	2.8	1.6
	CPO10-WGA	CPO10-DOP	CPO12-WGA	CPO13-WGA	CPOX1-WGA	CPOX2-WGA	CPOY-WGA	CPOY-DOP	CSA12-WGA	CSA12-DOP	CSAX1-WGA	CSAY-WGA
total	7.25972	10.94	11.79	9.63	12.4597	11.0021	7.92	17.27	10.7765	17.93	11.0089	11.0184
exon	8.10806	13.33	8.99	8.52	9.51795	9.79112	9.59	20.26	12.5807	18.29	10.2123	11.8858
intron	10.9768	13.57	15.26	8.52	12.7114	9.66562	9.76	19.04	11.3983	18.18	11.1341	13.3964
intergen	4.4796	8.22	9.44	11.22	12.7799	12.167	5.76	14.71	10.0211	17.58	11.0596	8.25437
